# Supplementary material for: Preparation of Various Nanomaterials via Controlled Gelation of a Hydrophilic Polymer Bearing Metal-Coordination Units with Metal Ions
Source: MDPI journal article supplement (doi:10.3390/gels8070435), 2022-07-11
Supplement: s1 [file s1]

# Preparation of Various Nanomaterials via Controlled Gelation of a Hydrophilic Polymer Bearing Metal-Coordination Units with Metal Ions

*Daisuke Nagai\*, Naoki Isobe, Tatsushi Inoue, Shusuke Okamoto, Yasuyuki Maki, and Takeshi Yamanobe*

## Table of Contents

|           |    |
|-----------|----|
| Figure S1 | S2 |
| Figure S2 | S2 |
| Figure S3 | S2 |
| Figure S4 | S3 |
| Figure S5 | S4 |

(a) rt

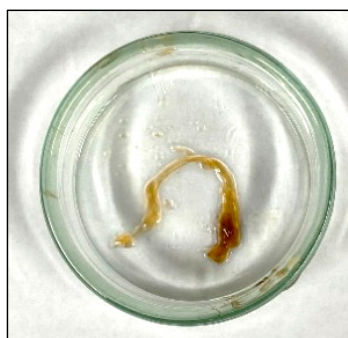

(b) 80 °C

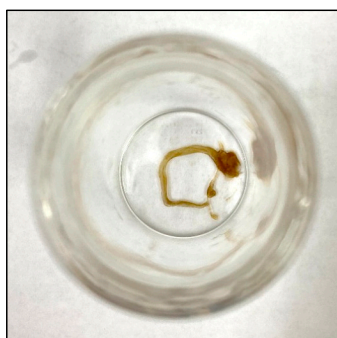

(c) pH 12

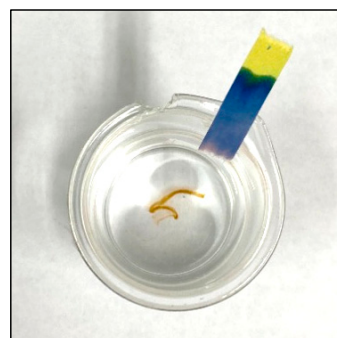

**Figure S1.** Stability of HPMC-10-Au

(a) rt

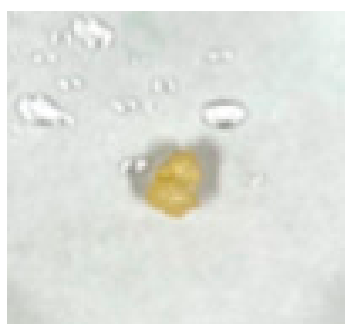

(b) 100 °C

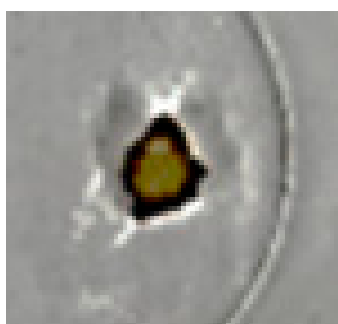

(c) pH 12

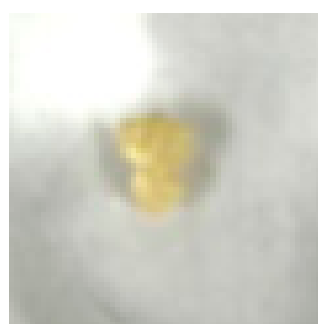

**Figure S2.** Stability of HPMC-34-Au

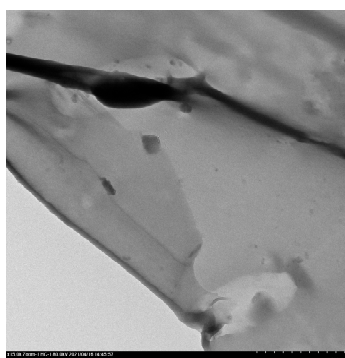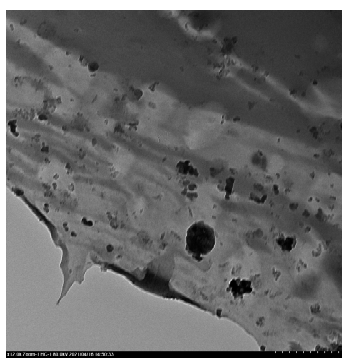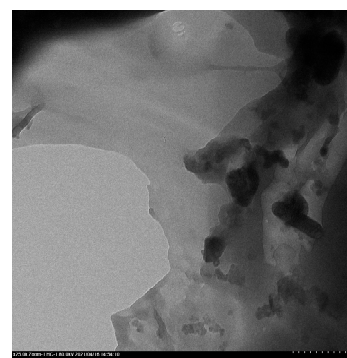

**Figure S3.** TEM images of HPMC-34-Au nanosheet.

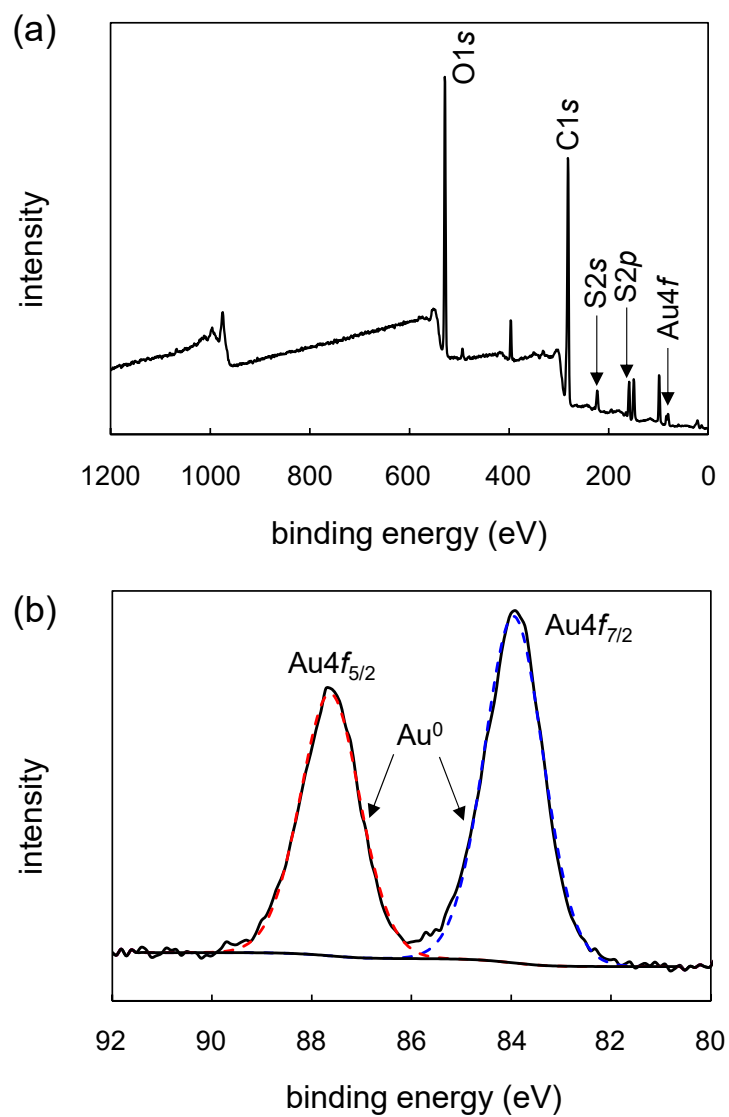

**Figure S4.** XPS spectra of Au<sup>0</sup> nanosheet : (a) wide-scan spectrum and (b) narrow-scan spectrum.

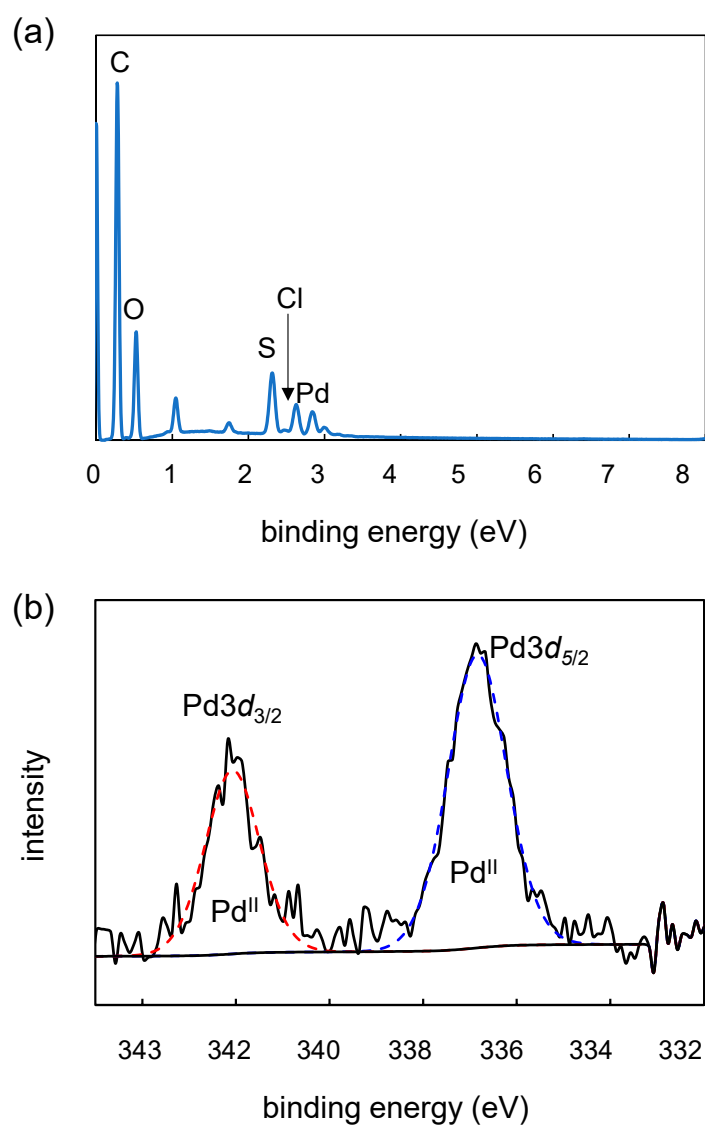

**Figure S5.** (a) EDX spectrum of  $\text{Pd}^{\text{II}}$  nanofiber. (b) XPS narrow-scan spectrum of  $\text{Pd}^{\text{II}}$  nanofiber.
